# Supplementary material for: Clinical, neuropathological, and molecular characteristics of rapidly progressive dementia with Lewy bodies: a distinct clinicopathological entity?
Source: Springer Nature journal article supplement (doi:10.1186/s13195-024-01565-x), 2024-09-10
Supplement: MOESM1 [file 13195_2024_1565_MOESM1_ESM.docx]

**Clinical, neuropathological, and molecular characteristics of rapidly progressive dementia with Lewy bodies: a distinct clinicopathological entity?**

Giuseppe Mario Bentivenga1, Simone Baiardi1,2, Andrea Mastrangelo1, Edoardo Ruggeri2, Angela Mammana2, Alice Ticca1, Marcello Rossi2, Sabina Capellari1,2, Piero Parchi1,2

1Department of Biomedical and Neuromotor Sciences (DiBiNeM), University of Bologna, Bologna, Italy

2IRCCS, Istituto delle Scienze Neurologiche di Bologna, Programma Neuropatologia delle Malattie Neurodegenerative, Bologna, Italy

**SUPPLEMENTARY MATERIALS**

**Supplementary methods**

**rpDLB patients selection**

In the total RPD cohort of 826 brains, 58 showed LBP pathology in neocortical or limbic stages. However, only 33 (4%) received a primary diagnosis of LBD (either DLB or PDD), given that all the others had a pathology known as a primary cause of RPD (i.e., CJD, Wernicke encephalopathy, primary CNS lymphoma, meningeal carcinomatosis). We also excluded 8 patients with a previous clinical PD diagnosis who developed an RPD syndrome in the late disease stage (i.e., the total disease duration was longer than 4 years) and three individuals with insufficient clinical documentation. We eventually selected 22 participants fulfilling our inclusion criteria for rpDLB (medical documentation indicating a previously neurologically unimpaired individual who developed an RPD syndrome lasting less than 4 years and showed LBP in the neocortical or limbic stage at post-mortem examination). Of note, in 18 out of 22 rpDLB cases eventually included, disease duration was <2 years.

**CJD and rpAD cohorts selection**

The CJD cohort included a consecutive series of 100 previously neurologically unimpaired individuals who developed a rapidly progressive neurological syndrome and showed neuropathological findings consistent with CJD [1], sent to our center from 2013 to 2022 for RPD diagnostic assessment. The overall cohort comprised 68 MM(V)1, 13 VV2, 13 MV2K, 5 MM(V)2C, and 1 VV1 patients. Among these, 23 patients showing a mixed subtype were classified based on the dominant histotype according to published criteria [2].

The rpAD cohort included all subjects sent to our center for RPD diagnostic assessment with medical charts indicating a previously neurologically unimpaired individual who developed an RPD syndrome lasting less than 4 years and who showed AD neuropathological changes as primary neuropathological diagnosis at post-mortem examination. As per inclusion criteria, none of rpAD patients showed LBP in limbic or neocortical stages. The overall rpAD cohort included 31 patients.

**Neuropathology score composition**

Each rpDLB case was given a composite neuropathology score (NP score) obtained by taking into account the following NP lesions: Alzheimer’s disease neuropathological changes (AD), atherosclerosis, small vessel disease (SVD), vascular brain injury (VBI), cerebral amyloid angiopathy (CAA) [3,4]. Lesions were scored into four categories of increasing severity (none=0, mild=1, moderate=2, and severe=3). For VBI-SVD sections three sub-variables (infarcts/lacunes, hemorrhages, and SVD), were coded into binary variables (no=0, yes=1) and then summed up (ranging from 0 to 3). Further points were added in case “other pathologies” (including hippocampal sclerosis (HS), primary age-related tauopathy [PART], limbic-predominant age-related TDP-43 encephalopathy [LATE]), coded as binary variables, were present (no=0, yes=1) [5,6]. Further details on NP score calculation are reported in Supplementary Table 1.

**Patients and control cohorts in LBP assessment and αSyn RT-QuIC SAA experiments**

LBP assessment through immunohistochemistry was performed in the whole rpDLB cohort (age at death: 75.0 [73.0-80.0] years; disease duration: 7.5 [2.0-21.0] months) and a control group of eight patients with typical LBD with dementia (age at death: 80 [77.3-81.8] years; disease duration: 11.0 [5.5-19.0] years). Age at death was not significantly different between the two groups.

Quantification of αSyn seeding activity was performed in brain homogenates from five rpDLB patients (age at death: 75.0 [73.0-77.0] years; disease duration: 2.0 [1.0-3.0] months) and a control group of five patients with typical LBD with dementia (age at death: 79.0 [72.0-81.0] years; disease duration: 12.0 [10.0-19.0] years). Age at death was not significantly different between the two groups.

**Supplementary Tables**

Supplementary Table 1 – NP score composition

| **NP lesion** | **Score** |
| --- | --- |
| AD | 0: none  1: ABC score – low  2: ABC score – intermediate  3: ABC score – high |
| Atherosclerosis | 0: none  1: mild  2: moderate  3: severe |
| VBI and SVD | infarcts/lacunes: 0: absent; 1: present  hemorrhages: 0: absent; 1: present  SVD: 0: absent; 1: present |
| CAA | 0: none  1: mild  2: moderate  3: severe |
| Other pathologies | HS: 0: absent; 1: present  PART: 0: absent; 1: present  LATE: 0: absent; 1: present |

Abbreviations: AD, Alzheimer’s disease; CAA, cerebral amyloid angiopathy; HS, hippocampal sclerosis; LATE, limbic-predominant age-related TDP-43 encephalopathy; PART, primary age-related tauopathy; SVD, small vessel disease; VBI, vascular brain injury

Supplementary Table 2 – LB score distribution per brain area in rpDLB cases

| **Case N** | **LB score** | **Brain area** | | | | | | | | | | | | | | | | | | | | | |
| --- | --- | --- | --- | --- | --- | --- | --- | --- | --- | --- | --- | --- | --- | --- | --- | --- | --- | --- | --- | --- | --- | --- | --- |
| **FC** | | **TC** | | **CIN** | | **EC** | | **HIPP** | | **AMG** | | **HYP** | | **BF** | | **SN** | | **PO** | | **MED** | |
| **LB** | **LN** | **LB** | **LN** | **LB** | **LN** | **LB** | **LN** | **LB** | **LN** | **LB** | **LN** | **LB** | **LN** | **LB** | **LN** | **LB** | **LN** | **LB** | **LN** | **LB** | **LN** |
| #1 | 61 | 2 | 1 | 3 | 2 | 3 | 2 | 3 | 3 | 3 | 3 | 3 | 3 | 3 | 3 | 3 | 3 | 3 | 3 | 3 | 3 | 3 | 3 |
| #2 | 56 | 3 | 1 | 3 | 1 | 3 | 2 | 3 | 0 | 2 | 2 | 3 | 3 | 3 | 3 | 3 | 3 | 3 | 3 | 3 | 3 | 3 | 3 |
| #3 | 66 | 3 | 3 | 3 | 3 | 3 | 3 | 3 | 3 | 3 | 3 | 3 | 3 | 3 | 3 | 3 | 3 | 3 | 3 | 3 | 3 | 3 | 3 |
| #4 | 59 | 2 | 1 | 3 | 3 | 2 | 2 | 3 | 3 | 2 | 3 | 3 | 3 | 3 | 3 | 2 | 3 | 3 | 3 | 3 | 3 | 3 | 3 |
| #5 | 54 | 2 | 0 | 3 | 1 | 3 | 2 | 3 | 2 | 0 | 2 | 3 | 3 | 3 | 3 | 3 | 3 | 3 | 3 | 3 | 3 | 3 | 3 |
| #6 | 52 | 2 | 0 | 3 | 0 | 3 | 1 | 3 | 1 | 2 | 1 | 3 | 3 | 3 | 3 | 3 | 3 | 3 | 3 | 3 | 3 | 3 | 3 |
| #7 | 39 | 1 | 0 | 1 | 0 | 2 | 0 | 2 | 0 | 0 | 0 | 3 | 2 | 3 | 2 | 3 | 2 | 3 | 3 | 3 | 3 | 3 | 3 |
| #8 | 52 | 1 | 0 | 2 | 0 | 3 | 0 | 3 | 1 | 3 | 3 | 3 | 3 | 3 | 3 | 3 | 3 | 3 | 3 | 3 | 3 | 3 | 3 |
| #9 | 52 | 1 | 0 | 2 | 0 | 2 | 1 | 3 | 2 | 2 | 3 | 3 | 3 | 3 | 3 | 3 | 3 | 3 | 3 | 3 | 3 | 3 | 3 |
| #10 | 34 | 0 | 0 | 0 | 0 | 1 | 0 | 1 | 0 | 1 | 0 | 1 | 1 | 3 | 3 | 3 | 3 | 2 | 3 | 3 | 3 | 3 | 3 |
| #11 | 37 | 0 | 0 | 0 | 0 | 2 | 0 | 2 | 0 | 1 | 0 | 1 | 1 | 3 | 3 | 3 | 3 | 3 | 3 | 3 | 3 | 3 | 3 |
| #12 | 38 | 1 | 0 | 1 | 0 | 2 | 0 | 1 | 0 | 0 | 0 | 3 | 1 | 3 | 3 | 3 | 3 | 3 | 2 | 3 | 3 | 3 | 3 |
| #13 | 49 | 2 | 1 | 2 | 0 | 3 | 1 | 2 | 0 | 2 | 0 | 3 | 3 | 3 | 3 | 3 | 3 | 3 | 3 | 3 | 3 | 3 | 3 |
| #14 | 41 | 1 | 0 | 1 | 0 | 2 | 0 | 2 | 0 | 2 | 2 | 2 | 0 | 3 | 3 | 3 | 3 | 3 | 3 | 3 | 2 | 3 | 3 |
| #15 | 45 | 1 | 0 | 1 | 0 | 3 | 0 | 3 | 1 | 1 | 0 | 3 | 3 | 3 | 3 | 3 | 3 | 3 | 3 | 2 | 3 | 3 | 3 |
| #16 | 45 | 2 | 0 | 1 | 0 | 3 | 1 | 3 | 0 | 0 | 0 | 3 | 2 | 3 | 3 | 3 | 3 | 3 | 3 | 3 | 3 | 3 | 3 |
| #17 | 56 | 2 | 1 | 3 | 1 | 2 | 2 | 3 | 3 | 2 | 1 | 3 | 3 | 3 | 3 | 3 | 3 | 3 | 3 | 3 | 3 | 3 | 3 |
| #18 | 52 | 1 | 0 | 2 | 0 | 2 | 1 | 3 | 1 | 3 | 3 | 3 | 3 | 3 | 3 | 3 | 3 | 3 | 3 | 3 | 3 | 3 | 3 |
| #19 | 37 | 0 | 0 | 2 | 1 | 2 | 1 | 2 | 0 | 1 | 2 | 2 | 3 | 2 | 2 | 2 | 3 | 3 | 3 | 0 | 0 | 3 | 3 |
| #20 | 47 | 1 | 0 | 2 | 0 | 2 | 0 | 3 | 1 | 3 | 2 | 3 | 3 | 3 | 3 | 3 | 3 | 3 | 3 | 2 | 1 | 3 | 3 |
| #21 | 44 | 1 | 0 | 1 | 0 | 1 | 3 | 2 | 3 | 2 | 2 | 3 | 3 | 3 | 2 | 3 | 3 | 3 | 3 | 1 | 1 | 2 | 2 |
| #22 | 53 | 3 | 1 | 3 | 0 | 3 | 0 | 3 | 0 | 3 | 1 | 3 | 3 | 3 | 3 | 3 | 3 | 3 | 3 | 3 | 3 | 3 | 3 |

LBs and LNs are scored separately. Abbreviations: AMG, amygdala; CIN, cingulate gyrus; CTRL, controls; EC, entorhinal cortex; FC, frontal cortex; HYP, hypothalamus; HIPP, hippocampus; LB, Lewy-body; MED, medulla oblongata; NP, neuropathology; PO, pons; SN, substantia nigra; TC, temporal cortex.

Supplementary Table 3 – Variants in genes related to neurodegenerative conditions identified in rpDLB cases

| **Case N** | **Gene** | **Nucleotide change** | **Protein change** | **Franklin ACMG Classification**  [7–9] | **Pathogenicity**  **ClinVar** [10] | **Frequency GnomAD1** [11] |
| --- | --- | --- | --- | --- | --- | --- |
| #3 | *EIF4G1* | c.37G>C | p.Ala13Pro | VUS  (PM2, PP2, BP4) | NR | 40670/296308 |
| #3 | *EIF4G1* | c.42_43del | p.Ser15ProfsX39 | NR | NR | 10852/981300 |
| #3 | *EIF4G1* | c.49_50del | p.Gly17ThrfsX37 | VUS  (PM2, MVS1) | NR | 11/1.068536 |
| #3 | *EIF4G1* | c.53T>C | p.Leu18Pro | VUS  (PM2, PP2, BP4) | NR | 1.406/474038 |
| #9 | *VPS13C* | c.2798C>T | p.Pro933Leu | VUS  (PM2, BP4) | VUS / PD | 44/1106114 |
| #9 | *GRN* | c.268G>A | p.Val90Met | VUS  (PM2, BP6) | Conflicting interpretation: VUS (1), likely benign (1) / GRN-FTLD | 52/1109970 |
| #10 | *SYNJ1* | c.2525C>A | p.Thr842Asn | VUS  (PM2) | VUS / PD | 41/1111998 |
| #16 | *NOTCH3* | c.2437G>A | p.Glu813Lys | VUS  (PP3, BP6) | Conflicting interpretation: VUS (3), likely benign (1), benign (1) / CADASIL | 27/1111868 |
| #19 | *MYORG* | c.1631T>A | p.Leu544Gln | VUS  (PM2) | NR | 2/1111420 |
| #22 | *GBA1* | c.586A>C | p.Lys196Gln | Likely pathogenic  (PM1, PP2, PM2, PP3) | Conflicting interpretation: pathogenic (1), VUS (3) / Gaucher disease, PD, DLB | 3221/1088742 |

1Population allele frequencies referred to the European (non-Finnish) population reported on GnomAD Exomes v24.0 expressed as allele count/allele number. Abbreviations: CADASIL, Cerebral Arteriopathy With Subcortical Infarcts And Leukoencephalopathy; DLB, dementia with Lewy bodies; FTLD, frontotemporal lobar degeneration; NR, not reported; PD, Parkinson’s disease; VUS, variant of uncertain significance

**Supplementary references**

1. Parchi P, Giese A, Capellari S, Brown P, Schulz-Schaeffer W, Windl O, et al. Classification of sporadic Creutzfeldt-Jakob disease based on molecular and phenotypic analysis of 300 subjects. Ann Neurol. 1999;46(2):224-233.

2. Parchi P, Strammiello R, Notari S, Giese A, Langeveld JPM, Ladogana A, et al. Incidence and spectrum of sporadic Creutzfeldt–Jakob disease variants with mixed phenotype and co-occurrence of PrPSc types: an updated classification. Acta Neuropathol. 2009;118:659–71.

3. Montine TJ, Phelps CH, Beach TG, Bigio EH, Cairns NJ, Dickson DW, et al. National Institute on Aging–Alzheimer’s Association guidelines for the neuropathologic assessment of Alzheimer’s disease: a practical approach. Acta Neuropathol. 2012;123:1–11.

4. Thal DR, Griffin WST, de Vos RAI, Ghebremedhin E. Cerebral amyloid angiopathy and its relationship to Alzheimer’s disease. Acta Neuropathol. 2008;115:599–609.

5. Crary JF, Trojanowski JQ, Schneider JA, Abisambra JF, Abner EL, Alafuzoff I, et al. Primary age-related tauopathy (PART): a common pathology associated with human aging. Acta Neuropathol. 2014;128:755–66.

6. Nelson PT, Dickson DW, Trojanowski JQ, Jack CR, Boyle PA, Arfanakis K, et al. Limbic-predominant age-related TDP-43 encephalopathy (LATE): consensus working group report. Brain. 2019;142:1503–27.

7. Richards S, Aziz N, Bale S, Bick D, Das S, Gastier-Foster J, et al. Standards and Guidelines for the Interpretation of Sequence Variants: A Joint Consensus Recommendation of the American College of Medical Genetics and Genomics and the Association for Molecular Pathology. Genet Med. 2015;17:405–24.

8. Pejaver V, Byrne AB, Feng B-J, Pagel KA, Mooney SD, Karchin R, et al. Calibration of computational tools for missense variant pathogenicity classification and ClinGen recommendations for PP3/BP4 criteria. Am J Hum Genet. 2022;109:2163–77.

9. Genoox. Franklin by Genoox. Available online: https://franklin.genoox.com. Accessed on 20 April 2024.

10. Landrum MJ, Lee JM, Benson M, Brown GR, Chao C, Chitipiralla S, et al. ClinVar: improving access to variant interpretations and supporting evidence. Nucleic Acids Res. 2018;46:D1062–7.

11. Karczewski KJ, Francioli LC, Tiao G, Cummings BB, Alföldi J, Wang Q, et al. The mutational constraint spectrum quantified from variation in 141,456 humans. Nature. 2020;581:434–43.
